# Supplementary material
Source: Springer Nature journal article supplement (https://www.springermedizin.de/resource/supplementary/12889_2012_4437_MOESM2_ESM.pdf/9492754)

Level 3 -  
Couples

Couple 1

Level 2 -  
Individuals

Individual (e.g. female)

Individual (e.g. male)

Level 1 -  
Observations

Pre-test

3- month

1-year

Pre-test

3- month

1-year

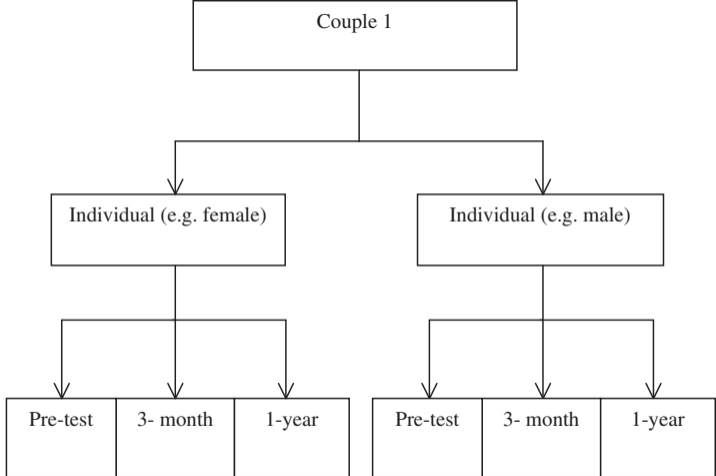

Supplement: MOESM2 [file 9492754]
